# Supplementary material for: Digital Endpoints for Assessing Instrumental Activities of Daily Living in Mild Cognitive Impairment: Systematic Review
Source: PubMed Central journal article supplement (PMC10410386; doi:10.2196/45658), 2023-07-25
Supplement: jmir_v25i1e45658_app1.pdf [file jmir_v25i1e45658_app1.pdf]

## Search Strategy

### Search Strategy

| Category                       | String                                                                                                                                                                                                                                                                                                                                                                                                                                                                                                                                                                                                                                                                                                                                                                                                                           | Notes |
|--------------------------------|----------------------------------------------------------------------------------------------------------------------------------------------------------------------------------------------------------------------------------------------------------------------------------------------------------------------------------------------------------------------------------------------------------------------------------------------------------------------------------------------------------------------------------------------------------------------------------------------------------------------------------------------------------------------------------------------------------------------------------------------------------------------------------------------------------------------------------|-------|
| <b>Cognitive Impairment</b>    | "cognitiv* impair*" or "memory impair*" or "cognitive decline*" or "cognitive dysfunction*" or "mental deterioration*" or "mild neurocognitive disorder*" or "preclinical AD" or "preclinical alzheimer* diseas*" or "preclinical dementia" or "cognitive deficit*" or MCI or aMCI or nMCI or mMCI or MCIa or MCD                                                                                                                                                                                                                                                                                                                                                                                                                                                                                                                |       |
| <b>Functional Independence</b> | "functional status" or "functional dependence" or "functional independence" or "independent living" or "activit* of daily living" or "daily living activit*" or "daily activit*" or ADL or ADLs or IADL or IADLs or "everyday functioning" or "functional assessment" or "functional abilit*" or "functional disabilit*" or "functional deficit*" or "functional capabilit*"                                                                                                                                                                                                                                                                                                                                                                                                                                                     |       |
| <b>Digital</b>                 | digital or tech* or biotech* or sens* or wearabl* or device* or "fitness tracker*" or "mobile application*" or mobile* or app or apps or application* or telemedicine* or telehealth or mhealth or ehealth or smartphon* or smartwatch* or smart-home* or "smart home*" or smarthome* or "activity recognition" or "geographical positioning system" or "gps" or on-body or "on body" or biosens* or motion-track* or actigraphy or accelerometer* or gyroscope or "remote measur* tech*" or RMT or "digital biomark*" or "unobtrusive sens*" or "home monitoring" or "smart assessment" or "ambient sens*" or "inertial measurement unit*" or "home based sens*" or "home-based sens*" or "passive monitor*" or "continuous monitor*" or freeliving or "real world" or "real-world" or "in-home monitor*" or "in home monitor*" |       |
| <b>Time Frame</b>              | 2004 - 2022                                                                                                                                                                                                                                                                                                                                                                                                                                                                                                                                                                                                                                                                                                                                                                                                                      |       |

("cognitiv\* impair\*" or "memory impair\*" or "cognitive decline\*" or "cognitive dysfunction\*" or "mental deterioration\*" or "mild neurocognitive disorder\*" or "preclinical AD" or "preclinical alzheimer\* diseas\*" or "preclinical dementia" or "cognitive deficit\*" or MCI or aMCI or nMCI or mMCI or MCIa or MCD) AND ("functional status" or "functional dependence" or "functional independence" or "independent living" or "activit\* of daily living" or "daily living activit\*" or "daily activit\*" or ADL or ADLs or IADL or IADLs or "everyday functioning" or "functional assessment" or "functional abilit\*" or "functional disabilit\*" or "functional deficit\*" or "functional capabilit\*") AND (digital or tech\* or biotech\* or sens\* or wearabl\* or device\* or "fitness tracker\*" or "mobile application\*" or mobile\* or app or apps or application\* or telemedicine\* or telehealth or mhealth or ehealth or smartphon\* or smartwatch\* or smart-home\* or "smart home\*" or smarthome\* or "activity recognition" or "geographical positioning system" or "gps" or on-body or "on body" or biosens\* or motion-track\* or actigraphy or accelerometer\* or gyroscope or "remote measur\* tech\*" or RMT or "digital biomark\*" or "unobtrusive sens\*" or "home monitoring" or "smart assessment" or "ambient sens\*" or "inertial measurement unit\*" or "home based sens\*" or "home-based sens\*" or "passive monitor\*" or "continuous monitor\*" or freeliving or "real world" or "real-world" or "in-home monitor\*" or "in home monitor\*")

"passive monitor\*" or "continuous monitor\*" or freelifing or "real world" or "real-world" or "in-home monitor\*" or "in home monitor\*")
